# Supplementary material for: Surgical treatment for shepherd’s crook deformity in fibrous dysplasia: THERE IS NO BEST, ONLY BETTER
Source: Springer Nature journal article supplement (doi:10.1007/s00264-018-4074-9), 2018-08-06
Supplement: MOESM3 [file 16012432]

Supplementary file:

| 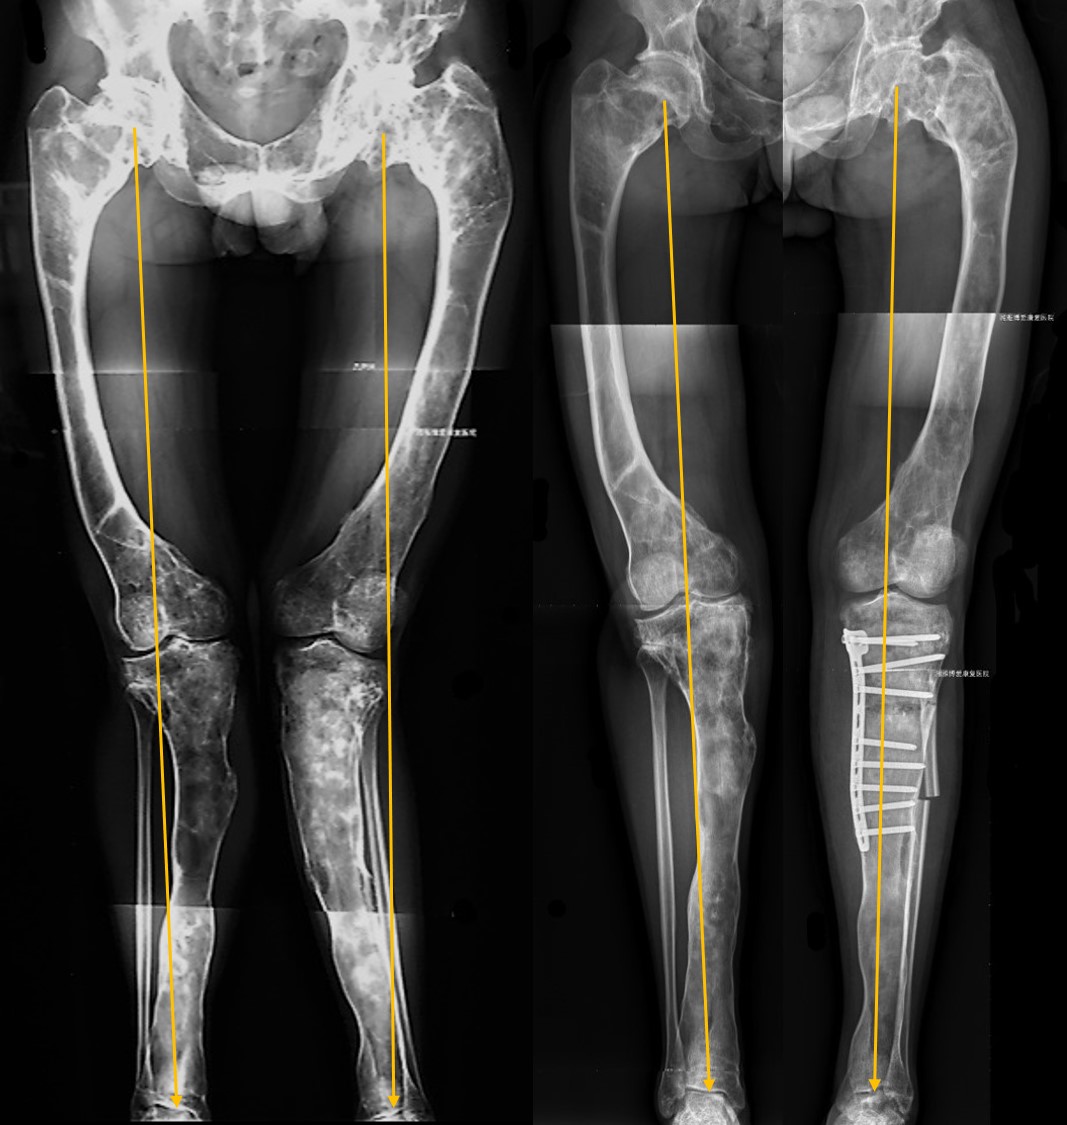 |
| --- |

In terms of this case, we are not included in our case series because he didn’t choose to correct the shepherd’s crook deformity first. In fact, he chose to correct the deformity in his left knee which, he thought, make him more uncomfortable. Interestingly, after surgery, he was fully satisfactory with the outcome. He had no any willing to taken another surgery to correct the shepherd’s deformity more. We think, in cases of shepherd’s crook deformity combined with knee deformity, mechanical axis of lower limb should be taken into account in advance. If mechanical axis presents a deformity of knee valgus which would be more obvious after correction of shepherd’s crook deformity in proximal femur. However, if deformity of knee varus presented, it will be improved after correction of shepherd’s crook deformity.

We want to share our experiences in this specific topic in near future when enough cases enrolled. Sorry for the unclear description on this issue which confused you and reviewers.

(PS: videos of his activity was uploaded along with this file.)
